# Supplementary material for: In situ formation of chiral core–shell nanostructures with raspberry-like gold cores and dense organic shells using catechin and their catalytic application
Source: Royal Society of Chemistry journal article supplement (doi:10.1039/c2jm32303f), 2012-01-01
Supplement: c2jm32303f.pdf [file c2jm32303f.pdf]

## Electronic Supplementary Information

### In Situ Formation of Chiral Core-Shell Nanostructures with Raspberry-Like Gold Core and Dense Organic Shells using Catechin and Their Catalytic Application

Manoj Raula, Dipanwita Maity, Md. Harunar Rashid and Tarun K. Mandal\*

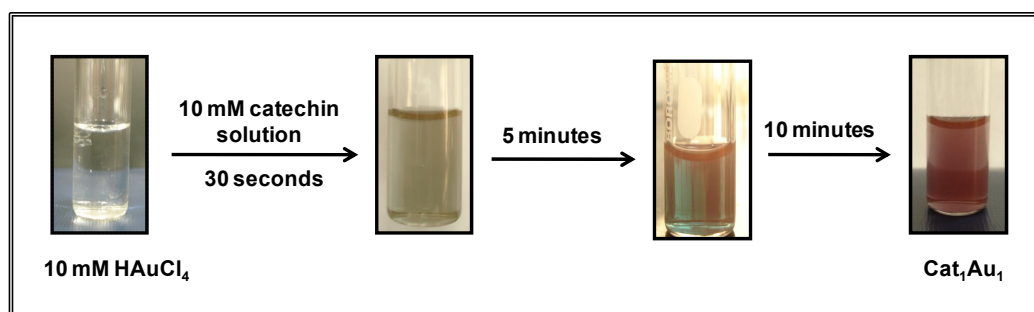

**Figure S1:** Photographs showing color changes at different stages during the synthesis of core-shell nanostructures.

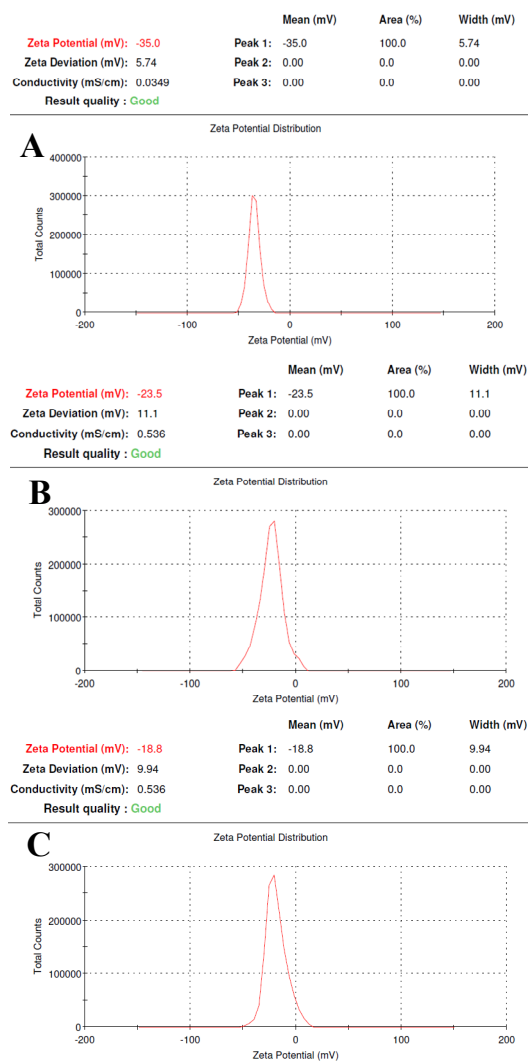

**Figure S2.** Zeta potential of different samples (A)  $\text{Cat}_1\text{Au}_1$  (B)  $\text{Cat}_2\text{Au}_1$  (C)  $\text{Cat}_3\text{Au}_1$  as measured from their aqueous suspensions.

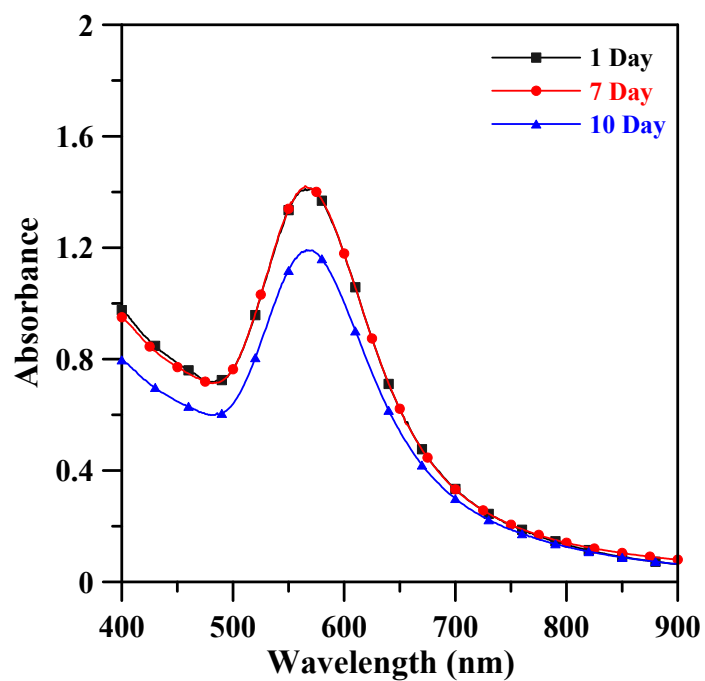

**Figure S3.** UV-vis absorption spectra of the aqueous suspension of the sample Cat<sub>1</sub>Au<sub>1</sub> for one, seven and ten days.

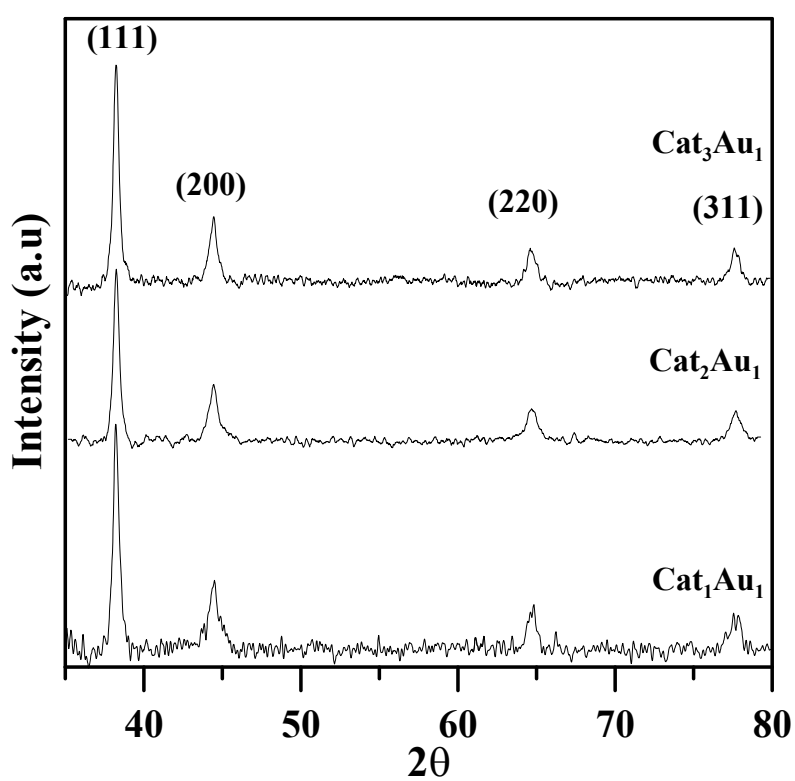

**Figure S4.** Powder X-ray diffraction patterns of different core-shell samples (see Table 1).

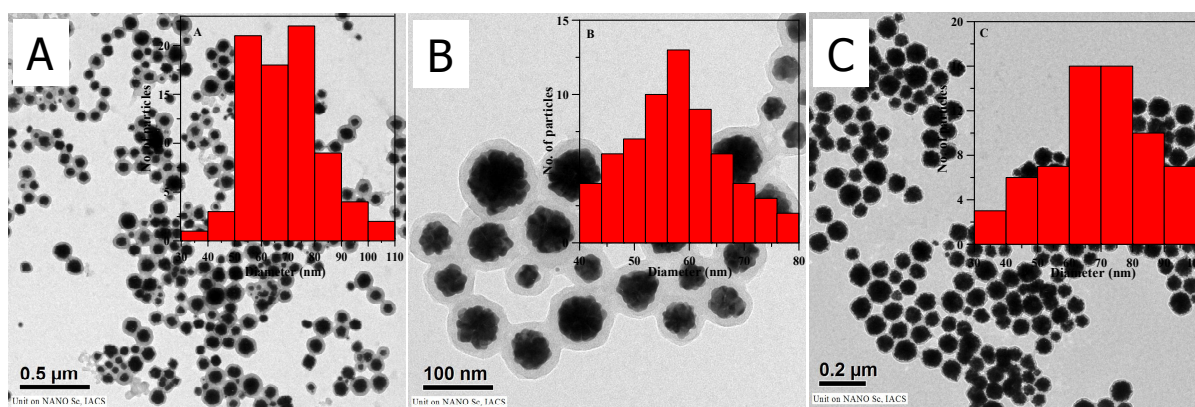

**Figure S5:** Histogram of particle size distribution of different samples (A) Cat<sub>1</sub>Au<sub>1</sub> (B) Cat<sub>2</sub>Au<sub>1</sub> and (C) Cat<sub>3</sub>Au<sub>1</sub>.

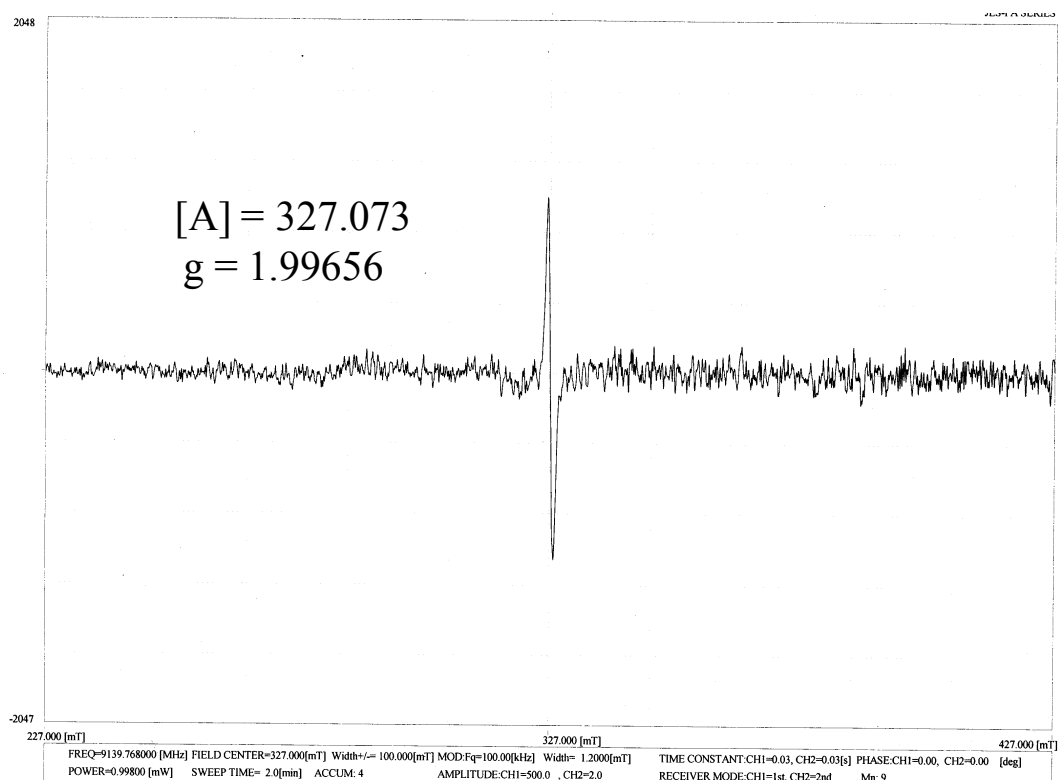

**Figure S6.** Electron paramagnetic resonance (EPR) spectrum of the sample  $\text{Cat}_1\text{Au}_1$  at 77 K.

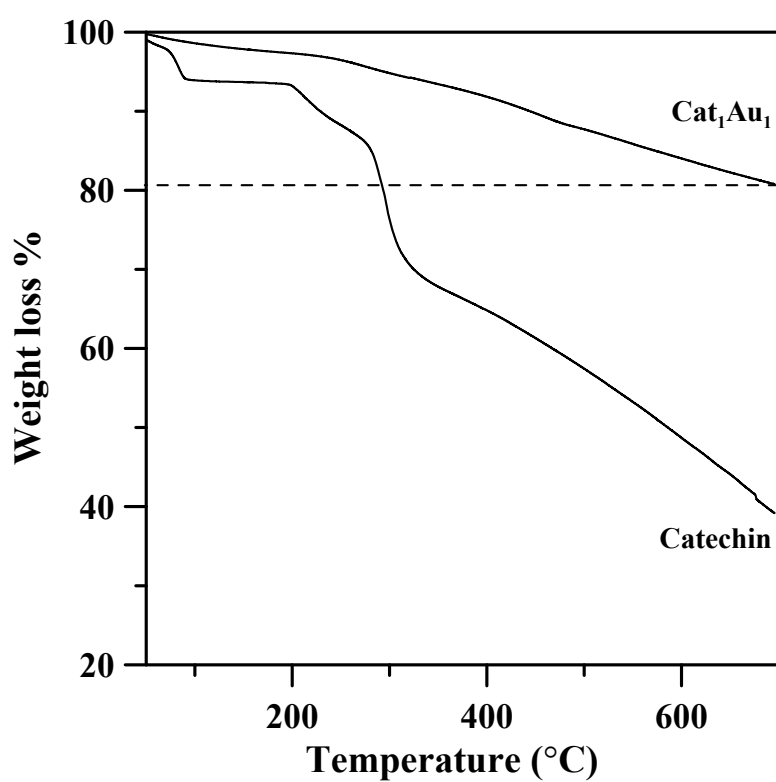

**Figure S7.** TGA thermograms of the sample Cat<sub>1</sub>Au<sub>1</sub> and neat catechin. TGA thermograms reveals about 18 wt % organic materials is present as a shell in the core-shell nanostructures.

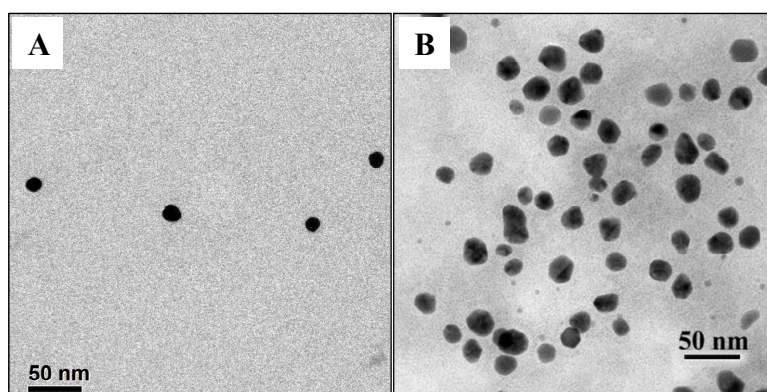

**Figure S8.** TEM images of (A) GNPs synthesized at pH = 9 and (B) GNPs synthesized in presence of MUA using catechin as a reducing agent.



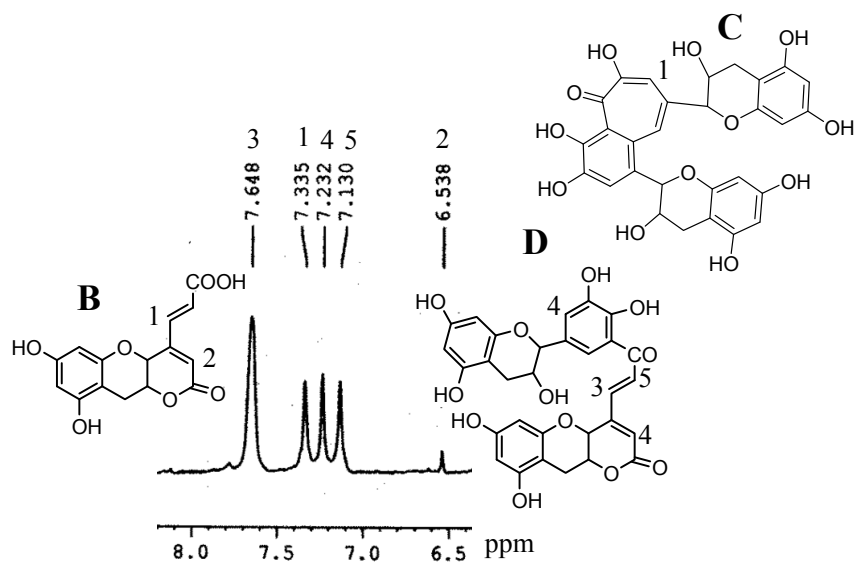

**Figure S9.** <sup>1</sup>H NMR spectrum of the isolated and purified shell materials obtained after KCN treatment followed by the dissolution in d<sup>6</sup>-DMSO.

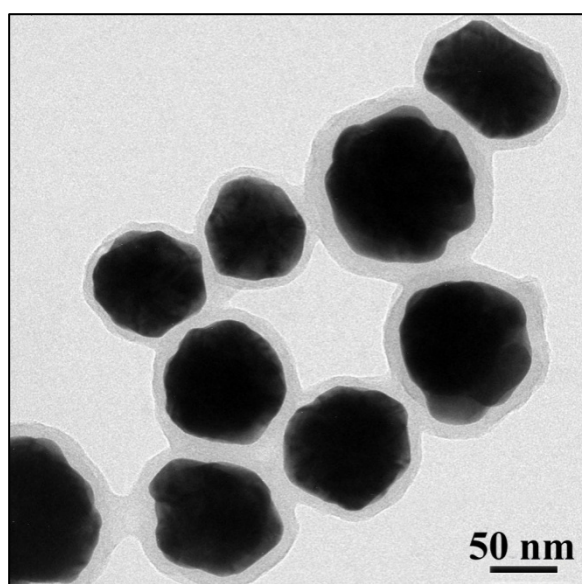

**Figure S10.** TEM image of the sample  $\text{Cat}_1\text{Au}_1$  sample after ligand exchange with MUA for 24h.

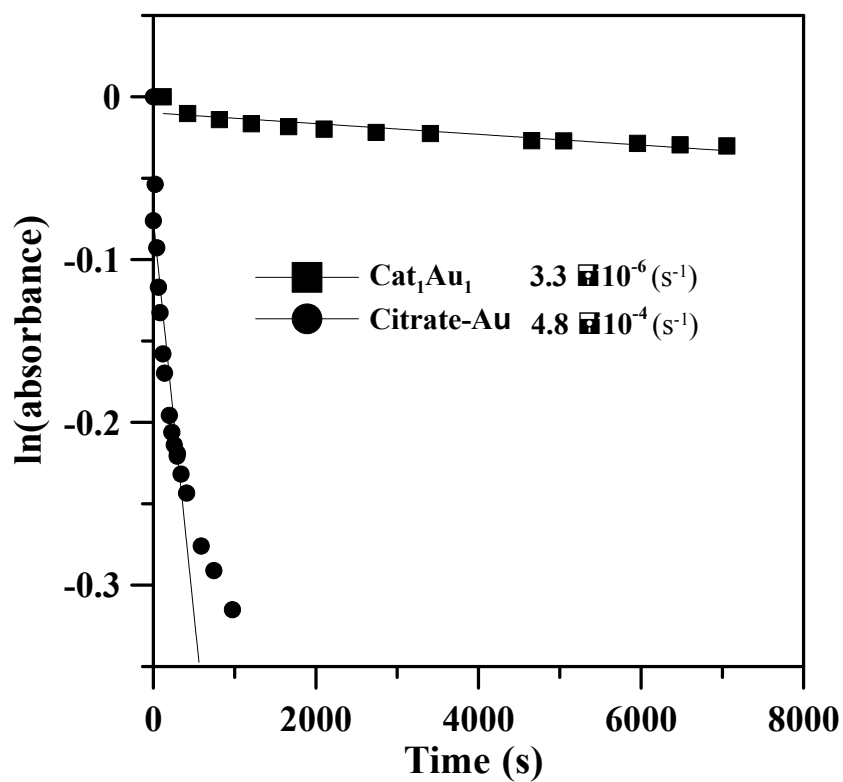

**Figure S11.** Plot showing dissolution of gold of Cat<sub>1</sub>Au<sub>1</sub> core-shell sample and citrate-stabilized Au nanoparticle sample with KCN in water at 25 °C.

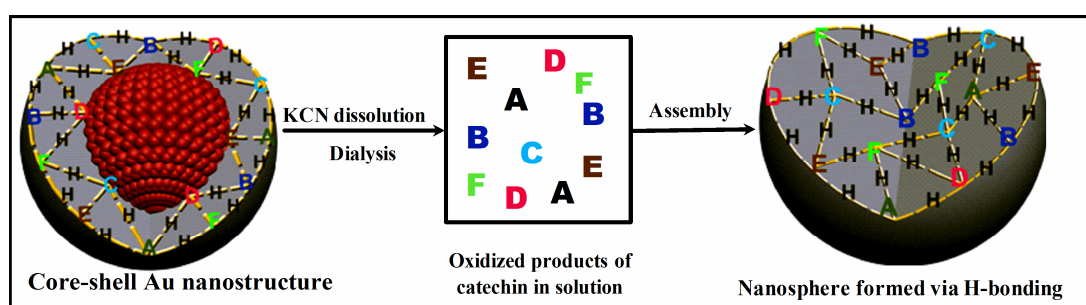

**Figure S12.** Schematic representation for the dissolution of Au core of the core-shell nanostructures and the formation of nanospheres by the assembly of oxidized products of catechin obtained after KCN treatment as shown in Scheme 1.

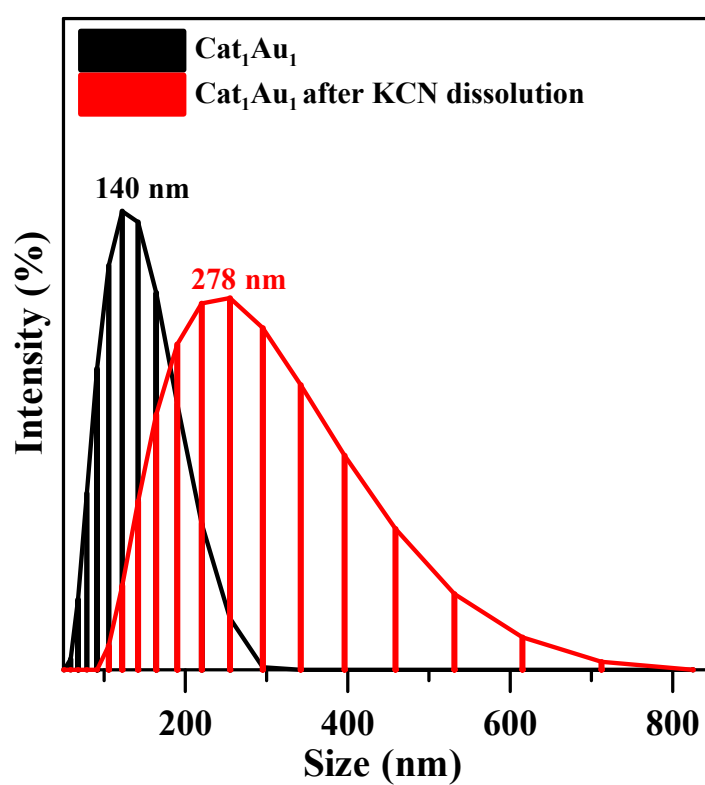

**Figure S13.** Plot showing log-normal distributions of the sizes of the sample  $\text{Cat}_1\text{Au}_1$  and the nanospheres obtained from the solution of sample  $\text{Cat}_1\text{Au}_1$  after with KCN.

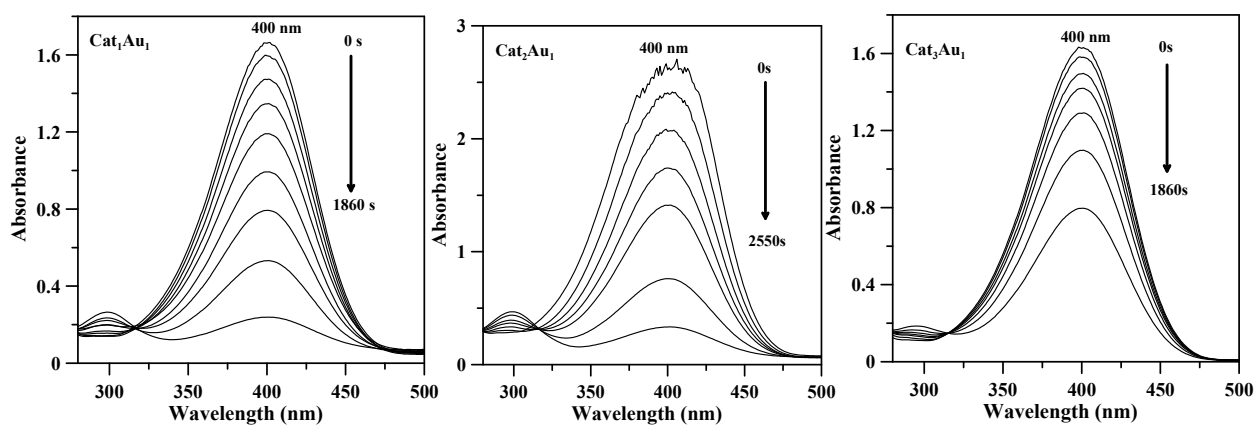

**Figure S14.** Successive UV-vis absorption spectra with time of the borohydride reduction of *p*-nitrophenol using different core-shell nanostructured smaples.

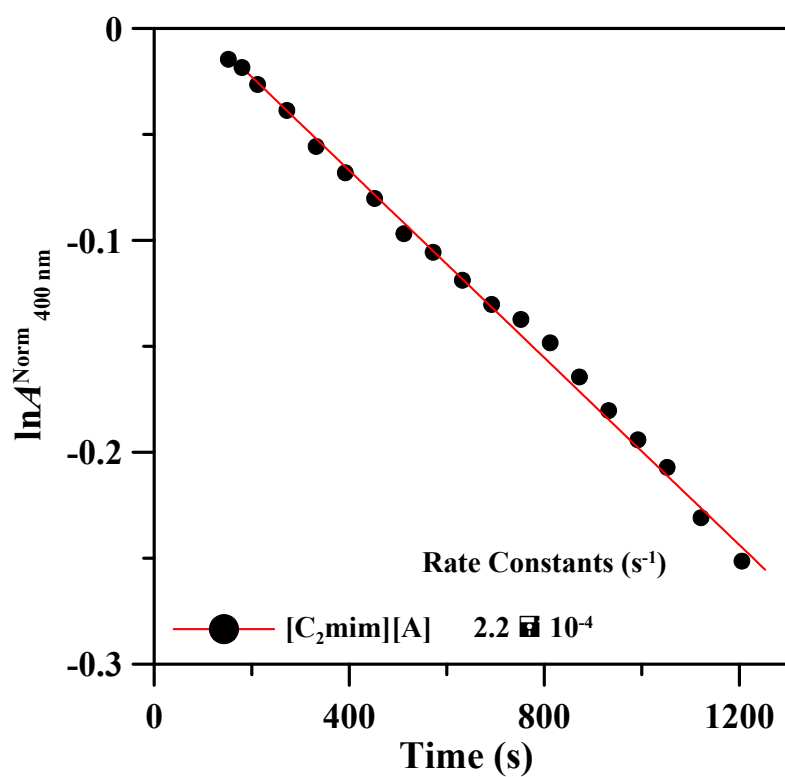

**Figure S15.** Plot showing  $\ln A$  ( $A$  = normalized absorbance at 400nm of *p*-nitrophenolate ion) versus time (s) in the reduction of *p*-nitrophenol catalyzed by  $[C_2mim][A]$ -Au raspberry shaped gold nanoparticles without any coating.
